# Supplementary material for: Temporally resolved UFP measurements and effect of dispersion conditions on particle concentration levels in a residential area affected by wood-smoke pollution from domestic heating during the winter months
Source: Copernicus journal article supplement (doi:10.5194/ar-2025-29), 2025-10-02
Supplement: Supplementary file [file ar-2025-29-AC2-supplement.pdf]

## Additional images for the review-process (Preprint ar-2025-29)

Peter Bächler<sup>1</sup>, Frederik Weis<sup>2</sup>, Sebastian Kohler<sup>2</sup>, Achim Dittler<sup>1</sup>

<sup>1</sup>Institute of Mechanical Process Engineering and Mechanics, Karlsruhe Institute of Technology, Karlsruhe, 76131, Germany

<sup>2</sup>Palas GmbH, Karlsruhe, 76187, Germany

Correspondence to: Peter Bächler ([peter.baechler@kit.edu](mailto:peter.baechler@kit.edu))

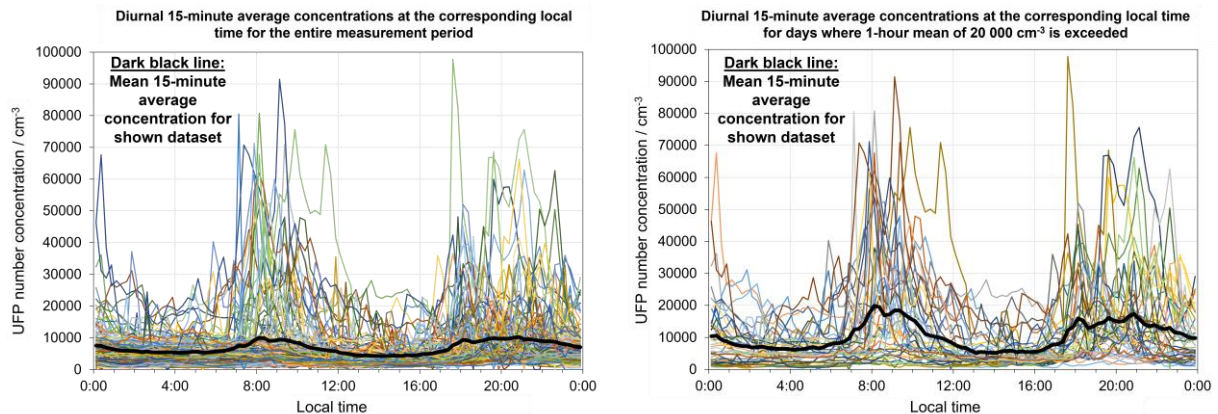

**Figure R1: Raw-data for the calculation of the diurnal patterns in Figure 4 of the main manuscript**

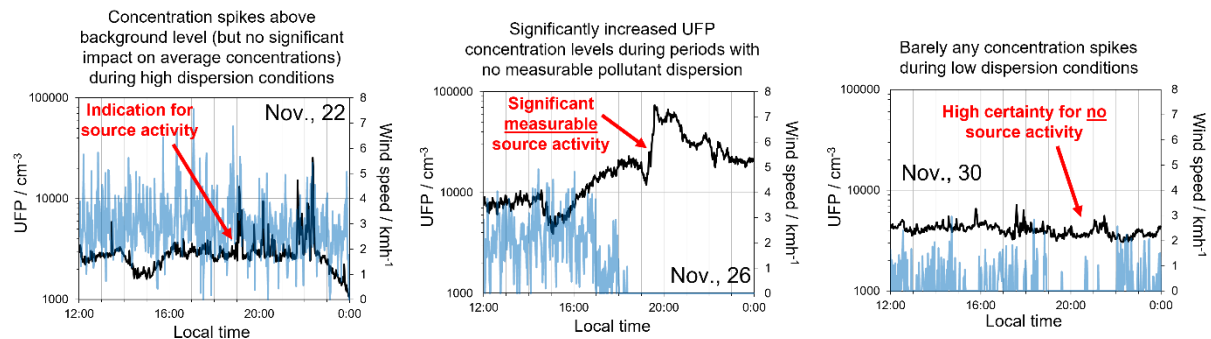

**Figure R2: UFP-concentrations in the context of wind speed for three exemplary days during the measurement period**

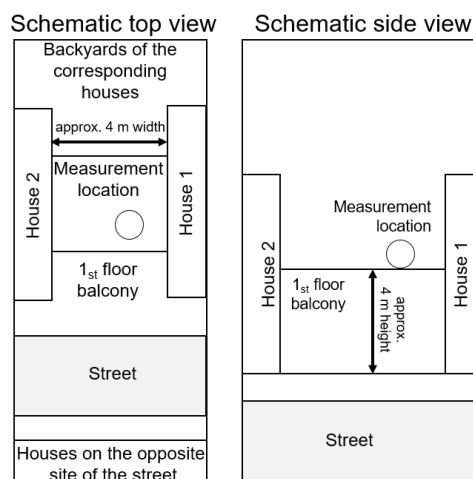

**Figure R3: Schematic of measurement position**
